# Supplementary material for: Effect of micro-concerts on the physical health and clinical symptoms of elderly people in nursing homes
Source: Research Square preprint supplement (doi:10.21203/rs.3.rs-4497929/v1), 2024-07-05
Supplement: Supplementary file 1 [file a19aead8bbc7f785477f395f.docx]

**Table 1**

*Studies with musical intervention on physical and psychological health in the elderly.*

| **Authors** | **Type of study** | **k** | **n** | **Age** | **Patients** | **Sessions** | **Minutes of session** | **Benefits** |
| --- | --- | --- | --- | --- | --- | --- | --- | --- |
| Aalbers et al. (2017) | SR | 9 | 421 | > 60 | Depression |  | 20-120 | - Depression. - Anxiety. |
| Bottiroli et al. (2014) | MI | 1 | 65 | 60-80 | Psychological disorder | 2 | 120 | - Processing. - Memory. |
| Catillejos & Godoy (2021) | MI | 1 | 50 | > 65 |  | 14 | 30-45 | - Physical health. - Cognition. - Welfare. - Pain. |
| Chang et al. (2015) | MA | 10 | 465 | 65-87 | Dementia |  | 10-64 | - Anxiety. - Depression. - Stress. - Cognition. |
| Chen et al. (2021) | SR | 5 | 288 | > 60 | Parkinson and Alzheimer | 2-12 | 30-60 | - Sleep. |
| Clare & Camic (2020) | SR | 14 | 742 |  | Dementia |  |  | - Cognition. - Depression. - Anxiety. |
| Dhippayom et al. (2022) | SR | 15 | 1144 | > 60 | Disability and depression | 3-36 | 20-90 | - Depression. |
| Dorris et al. (2021) | SR | 21 | 1472 | > 65 | Mild cognitive impairment and dementia. | 4-40 | 30-120 | - Cognition. |
| Gómez-Romero et al. (2017) | SR | 11 | 591 | > 65 | Dementia | 9-12 |  | - Anxiety. - Physical. |
| Hofbauer et al. (2022) | SR | 10 | 327 | > 60 | Dementia |  |  | - Memory. - Welfare. - Anxiety. - Pain. |
| Ing-Randolph et al. (2015) | SR | 8 | 271 | > 65 | Dementia | 6-18 | 30-45 | - Anxiety. |
| Li et al. (2019) | SR | 7 | 388 | > 65 | Dementia | 12-240 | 20-65 | - Depression. |
| Li et al. (2022) | SR | 8 | 356 | 52-94 | Alzheimer | 1-25 | 22-45 | - Cognition. - Physical function. - Welfare. |
| Machado et al. (2018) | SR | 15 | 179 | 18-85 | Parkinson |  | 2-30 | - Physical. |
| Mileski et al. (2019) | SR | 30 | 14104 | > 50 | Dementia |  |  | - Depression. - Physical. |
| Quach & Lee (2017) | SR | 13 | 550 |  | Chronic disease |  | 30-120 | - Welfare. |
| Rusowicz et al. (2022) | SR | 8 |  | > 60 | Parkinson. Stroke. |  |  | - Physical. |
| Sousa et al. (2021) | SR | 130 | 43 |  | Dementia | 1-240 | 15-120 | - Welfare. |
| Steen et al. (2018) | SR | 22 | 1097 | > 65 | Dementia | 8-144 | 10-90 | - Welfare. - Anxiety. |
| Sun et al. (2021) | MI | 1 | 132 | > 65 | Healthy | 12 | 120 | - Cognition. - Depression. - Physical. |
| Tang et al. (2020) | MA | 55 | 4004 | 12-86 | Dementia | 2-52 | 15-120 | - Depression. |
| Tsoi et al. (2018) | MA | 38 | 1418 | 75-90 | Dementia | 1-24 |  | - Physical. - Apathy. - Anxiety. |
| Ueda et al. (2013) | MA | 20 | 651 | > 65 | Dementia | 10 | 36 | - Anxiety. |
| Xu et al. (2017) | MA | 10 | 966 | > 65 | Healthy | 12-52 |  | - Cognition. - Physical. |
| Yu et al. (2022) | MI | 1 | 238 | > 65 | Mild cognitive impairment | 20 | 30 | - Depression. |
| Zhang et al. (2017) | SR | 34 | 1757 | > 60 | Dementia |  |  | - Anxiety. - Physical. - Cognition. - Depression. |
| Zhao et al. (2016) | SR | 19 | 1540 | > 60 | Depression | 3-24 |  | - Depression. |

**Leyend:** MA, Meta-analysis; SR, Systematic review; MI, Musical intervention; k, number of studies; n, sample size.

**Table 2**

*Mean differences in age, educational level and length of stay in the nursing home according to the group (experimental and control).*

| **Measure** | **Group** | ***M (SD)*** | **Test *t*** |
| --- | --- | --- | --- |
| Age | Experimental  Control | 84.85 (8,87)  85.83 (7.39) | *t*91 = -0.58, *p* = 0.566 |
| Educational level | Experimental  Control | 1.32 (1.09)  1.35 (0.97) | *t*91 = -0.13, *p* = 0.894 |
| Time in residence | Experimental  Control | 2.45 (1.97)  2.72 (2.52) | *t*91 = -0.57, *p* = 0.568 |

**Table 3**

*Distribution of Physical Health and Clinical Symptoms in the Three Temporal Measures and Internal Consistency (Cronbach's α)*

| **Measures** |  |  | **Pretreatment** | | |  |  | **Intermediate** | |  |  |  | **Postreatment** | | |
| --- | --- | --- | --- | --- | --- | --- | --- | --- | --- | --- | --- | --- | --- | --- | --- |
|  | ***M*** | ***SD*** | **Asymmetry** | **Kurtosis** | ***α*** | ***M*** | ***SD*** | **Asymmetry** | **Kurtosis** | ***α*** | ***M*** | ***SD*** | **Asymmetry** | **Kurtosis** | ***α*** |
| General Health (SF-36) | 14.28 | 3.75 | 0.04 | -0.66 | 0.70 | 13.78 | 3.90 | -0.11 | -0.44 | 0.80 | 13.56 | 4.47 | -0.15 | -0.89 | 0.87 |
| Physical Function (SF-36) | 15.85 | 6.31 | 0.71 | -0.77 | 0.95 | 15.47 | 6.39 | 0.80 | -0.74 | 0.96 | 16.04 | 6.73 | 0.65 | -1.03 | 0.96 |
| Physical Role (SF-36) | 5.80 | 1.83 | 0.19 | -1.85 | 0.94 | 5.75 | 1.84 | 0.22 | -1.85 | 0.94 | 6.01 | 1.93 | -0.02 | -1.97 | 0.97 |
| Emotional Role (SF-36) | 4.39 | 1.41 | 0.16 | -1.88 | 0.93 | 4.42 | 1.41 | 0.12 | -1.90 | 0.93 | 4.47 | 1.41 | 0.03 | -1.91 | 0.93 |
| Social Function (SF-36) | 7.16 | 2.25 | 0.21 | -0.72 | 0.69 | 6.49 | 2.36 | -0.12 | -0.85 | 0.57 | 6.85 | 2.53 | -0.09 | -0.93 | 0.83 |
| No Body Pain (SF-36) | 6.55 | 2.42 | 0.29 | -0.60 | 0.69 | 5.89 | 2.19 | 0.10 | -0.87 | 0.73 | 6.06 | 2.33 | 0.40 | -0.89 | 0.85 |
| Vitality (SF-36) | 14.49 | 3.86 | -0.22 | -0.07 | 0.81 | 13.81 | 4.10 | -0.20 | -0.93 | 0.81 | 14.09 | 4.32 | -0.27 | -0.66 | 0.86 |
| Mental Health (SF-36) | 19.90 | 4.29 | -0.38 | 0.09 | 0.79 | 19.87 | 4.39 | -0.48 | -0.13 | 0.72 | 20.02 | 4.63 | -0.05 | -0.69 | 0.81 |
| Health Transition (SF-36) | 2.56 | 0.81 | -0.01 | 0.17 |  | 2.54 | 0.89 | 0.03 | -0.27 |  | 2.41 | 0.89 | 0.14 | -0.66 |  |
| Total (SF-36) | 90.98 | 20.62 | 0.20 | -0.60 | 0.85 | 88.03 | 21.70 | -0.03 | -0.89 | 0.87 | 89.52 | 24.57 | 0.08 | -1.03 | 0.90 |
| Somatization (SCL-90-R) | 0.76 | 0.59 | 0.79 | 0.68 | 0.80 | 0.95 | 0.62 | 0.35 | -0.68 | 0.90 | 0.98 | 0.68 | 0.62 | 0.24 | 0.89 |
| Obsessive Compulsive (SCL-90-R) | 0.72 | 0.57 | 0.90 | 0.52 | 0.77 | 0.88 | 0.63 | 0.57 | -0.28 | 0.80 | 0.96 | 0.71 | 1.01 | 1.54 | 0.86 |
| Interpersonal Susceptibility (SCL-90-R) | 0.43 | 0.48 | 1.93 | 4.20 | 0.77 | 0.52 | 0.55 | 1.33 | 1.06 | 0.79 | 0.65 | 0.67 | 1.40 | 1.83 | 0.86 |
| Depression (SCL-90-R) | 0.69 | 0.56 | 1.01 | 0.85 | 0.82 | 0.96 | 0.73 | 0.85 | 0.24 | 0.87 | 1.02 | 0.76 | 0.66 | -0.13 | 0.89 |
| Anxiety (SCL-90-R) | 0.39 | 0.44 | 2.30 | 6.44 | 0.81 | 0.54 | 0.59 | 1.43 | 1.37 | 0.87 | 0.57 | 0.63 | 1.56 | 2.36 | 0.90 |
| Hostility (SCL-90-R) | 0.39 | 0.57 | 2.63 | 8.61 | 0.85 | 0.51 | 0.64 | 1.67 | 2.47 | 0.88 | 0.52 | 0.66 | 1.93 | 4.54 | 0.88 |
| Phobic Anxiety (SCL-90-R) | 0.41 | 0.54 | 1.62 | 2.39 | 0.75 | 0.60 | 0.61 | 1.23 | 1.59 | 0.79 | 0.67 | 0.77 | 1.64 | 3.28 | 0.88 |
| Paranoid Ideation (SCL-90-R) | 0.39 | 0.53 | 1.85 | 3.32 | 0.76 | 0.38 | 0.45 | 1.41 | 2.54 | 0.71 | 0.50 | 0.62 | 1.72 | 3.62 | 0.83 |
| Psychoticism (SCL-90-R) | 0.31 | 0.43 | 1.99 | 3.89 | 0.81 | 0.35 | 0.43 | 1.50 | 1.71 | 0.79 | 0.49 | 0.60 | 1.84 | 4.62 | 0.86 |
| General Symptom Index (SCL-90-R) | 0.53 | 0.43 | 1.56 | 3.11 | 0.97 | 0.68 | 0.50 | 0.83 | 0.28 | 0.97 | 0.75 | 0.60 | 1.28 | 2.41 | 0.98 |
| Total (SCL-90-R) | 0.00 | 0.97 | 1.92 | 4.51 | 0.93 | 0.00 | 0.98 | 0.97 | 0.46 | 0.94 | 0.00 | 0.98 | 1.46 | 2.84 | 0.96 |

**Table 4**

*Results for within- and between-factor repeated-measures ANOVA for each dependent variable.*

| **Measure** | **Group** | **Mean (SD)** | | | **Intra-subject effect** | | **Inter-subject effect** | **Box´s Test** | **Levene´s Test** | | |
| --- | --- | --- | --- | --- | --- | --- | --- | --- | --- | --- | --- |
| **Pre** | **Inter** | **Post** | **Factor** | **Interaction** | **Pre** | **Inter** | **Post** |
| SF-36 – General Health | Control | 14.67 (4.04) | 13.35 (4.20) | 12.63 (4.63) | *F*2,182 = 2.73,  *p* = 0.068, *η2partial* = 0.029 | *F*2,182 = 8.47,  *p* = 0.001, *η2partial* = 0.085 | *F*1,91 = 0.74,  *p* = 0.393, *η2partial* = 0.008 | *F*6,59921 = 0.98, *p* = 0.434 | *F*1,91 = 2.11, *p* = 0.150 | *F*1,91 = 2.33, *p* = 0.130 | *F*1,91 = 1.42, *p* = 0.236 |
| Experi. | 13.89 (3.44) | 14.21 (3.57) | 14.47 (4.15) |
| SF-36 – Physical Function | Control | 16.39 (6.71) | 14.22 (5.70) | 14.46 (5.95) | *F*2,182 = 0.56,  *p* = 0.571, *η2partial* = 0.006 | *F*2,182 = 8.54,  *p* < 0.001, *η2partial* = 0.086 | *F*1,91 = 1.69,  *p* = 0.197, *η2partial* = 0.018 | *F*6,59921 = 3.82, *p* = 0.001 | *F*1,91 = 2.84, *p* = 0.095 | *F*1,91 = 4.53, *p* = 0.036 | *F*1,91 = 2.87, *p* = 0.094 |
| Experi. | 15.32 (5.91) | 16.70 (6.84) | 17.60 (7.15) |
| SF-36 – Physical Role | Control | 5.96 (1.93) | 5.35 (1.77) | 5.54 (1.92) | *F*2,182 = 1.14,  *p* = 0.323, *η2partial* = 0.012 | *F*2,182 = 7.14,  *p* = 0.001, *η2partial* = 0.073 | *F*1,91 = 2.16,  *p* = 0.145, *η2partial* = 0.023 | *F*6,59921 = 1.59, *p* = 0.145 | *F*1,91 = 5.86, *p* = 0.017 | *F*1,91 = 0.51, *p* = 0.476 | *F*1,91 = 1.04, *p* = 0.311 |
| Experi. | 5.64 (1.74) | 6.15 (1.84) | 6.47 (1.84) |
| SF-36 – Emocional Role | Control | 4.54 (1.46) | 4.13 (1.39) | 4.22 (1.40) | *F*2,182 = 0.16,  *p* = 0.850, *η2partial* = 0.002 | *F*2,182 = 5.67,  *p* = 0.009, *η2partial* = 0.059 | *F*1,91 = 1.18,  *p* = 0.280, *η2partial* = 0.013 | *F*6,59921 = 1.12, *p* = 0.348 | *F*1,91 = 3.74, *p* = 0.056 | *F*1,91 = 0.02, *p* = 0.883 | *F*1,91 = 0.00, *p* = 0.999 |
| Experi. | 4.23 (1.35) | 4.70 (1.38) | 4.72 (1.39) |
| SF-36 – Social Function | Control | 7.24 (2.51) | 6.35 (2.40) | 6.43 (2.50) | *F*2,182 = 4.25,  *p* = 0.019, *η2partial* = 0.045 | *F*2,182 = 2.26,  *p* = 0.107, *η2partial* = 0.024 | *F*1,91 = 0.59,  *p* = 0.446, *η2partial* = 0.006 | *F*6,59921 = 2.33, *p* = 0.030 | *F*1,91 = 4.71, *p* = 0.033 | *F*1,91 = 0.33, *p* = 0.565 | *F*1,91 = 0.01, *p* = 0.909 |
| Experi. | 7.09 (1.99) | 6.64 (2.50) | 7.26 (2.51) |
| SF-36 – No Body Pain | Control | 6.63 (2.57) | 5.65 (2.07) | 5.17 (1.76) | *F*2,182 = 4.18,  *p* = 0.017, *η2partial* = 0.044 | *F*2,182 = 8.52,  *p* < 0.001, *η2partial* = 0.086 | *F*1,91 = 3.30,  *p* = 0.073, *η2partial* = 0.035 | *F*6,59921 = 1.47, *p* = 0.184 | *F*1,91 = 1.16, *p* = 0.284 | *F*1,91 = 0.21, *p* = 0.650 | *F*1,91 = 9.09, *p* = 0.003 |
| Experi. | 6.47 (2.28) | 6.13 (2.30) | 6.94 (2.50) |
| SF-36 – Vitality | Control | 14.04 (4.10) | 12.98 (3.82) | 12.83 (3.90) | *F*2,182 = 1.84,  *p* = 0.162, *η2partial* = 0.020 | *F*2,182 = 2.43,  *p* = 0.091, *η2partial* = 0.026 | *F*1,91 = 5.42,  *p* = 0.022, *η2partial* = 0.056 | *F*6,59921 = 3.93, *p* = 0.001 | *F*1,91 = 0.78, *p* = 0.381 | *F*1,91 = 1.30, *p* = 0.257 | *F*1,91 = 1.60, *p* = 0.209 |
| Experi. | 14.94 (3.58) | 14.62 (4.25) | 15.32 (4.38) |
| SF-36 – Mental Health | Control | 19.98 (4.54) | 19.61 (4.18) | 18.46 (4.03) | *F*2,182 = 0.07,  *p* = 0.937, *η2partial* = 0.001 | *F*2,182 = 9,50,  *p* < 0.001, *η2partial* = 0.095 | *F*1,91 = 2.17,  *p* = 0.144, *η2partial* = 0.023 | *F*6,59921 = 0.71, *p* = 0.646 | *F*1,91 = 0.65, *p* = 0.424 | *F*1,91 = 0.78, *p* = 0.378 | *F*1,91 = 2.82, *p* = 0.097 |
| Experi. | 19.83 (4.08) | 20.13 (4.63) | 21.55 (4.69) |
| SF-36 – Health Transition | Control | 2.54 (0.78) | 2.41 (0.86) | 2.26 (0.77) | *F*2,182 = 1.71,  *p* = 0.184, *η2partial* = 0.018 | *F*2,182 = 1.24,  *p* = 0.292, *η2partial* = 0.013 | *F*1,91 = 1.68,  *p* = 0.199, *η2partial* = 0.018 | *F*6,59921 = 1.23, *p* = 0.285 | *F*1,91 = 0.12, *p* = 0.727 | *F*1,91 = 0.01, *p* = 0.914 | *F*1,91 = 5.10, *p* = 0.026 |
| Experi. | 2.57 (0.85) | 2.66 (0.92) | 2.55 (0.97) |
| SF-36 – Total | Control | 92.00 (21.59) | 84.04 (19.52) | 82.00 (20.98) | *F*2,182 = 1.24,  *p* = 0.291, *η2partial* = 0.013 | *F*2,182 = 9.96,  *p* < 0.001, *η2partial* = 0.099 | *F*1,91 = 3.02,  *p* = 0.086, *η2partial* = 0.032 | *F*6,59921 = 3.17, *p* = 0.004 | *F*1,91 = 0.67, *p* = 0.417 | *F*1,91 = 1.88, *p* = 0.173 | *F*1,91 = 1.98, *p* = 0.163 |
| Experi. | 89.98 (19.81) | 91.94 (23.18) | 96.87 (25.78) |
| SCL-90-R - Somatization | Control | 0.84 (0.68) | 1.03 (0.57) | 1.17 (0.65) | *F*2,182 = 5.05,  *p* = 0.007, *η2partial* = 0.053 | *F*2,182 = 1.66,  *p* = 0.193, *η2partial* = 0.018 | *F*1,91 = 5.51,  *p* = 0.021, *η2partial* = 0.057 | *F*6,59921 = 11.52, *p* < 0.001 | *F*1,91 = 4.34, *p* = 0.040 | *F*1,91 = 2.31, *p* = 0.132 | *F*1,91 = 0.31, *p* = 0.577 |
| Experi. | 0.69 (0.48) | 0.87 (0.65) | 0.79 (0.66) |
| SCL-90-R – Obsessive Compulsive | Control | 0.85 (0.66) | 1.14 (0.66) | 1.31 (0.73) | *F*2,182 = 5.22,  *p* = 0.006, *η2partial* = 0.054 | *F*2,182 = 3.71,  *p* = 0.026, *η2partial* = 0.039 | *F*1,91 = 35.40,  *p* < 0.001, *η2partial* = 0.280 | *F*6,59921 = 11.19, *p* < 0.001 | *F*1,91 = 11.03, *p* = 0.001 | *F*1,91 = 4.97, *p* = 0.028 | *F*1,91 = 2.36, *p* = 0.128 |
| Experi. | 0.59 (0.43) | 0.62 (0.48) | 0.63 (0.50) |
| SCL-90-R – Interpersonal Susceptibility | Control | 0.52 (0.60) | 0.56 (0.62) | 0.77 (0.75) | *F*2,182 = 5.66,  *p* = 0.004, *η2partial* = 0.059 | *F*2,182 = 0.60,  *p* = 0.550, *η2partial* = 0.007 | *F*1,91 = 3.47,  *p* = 0.066, *η2partial* = 0.037 | *F*6,59921 = 11.43, *p* < 0.001 | *F*1,91 = 11.73, *p* = 0.001 | *F*1,91 = 2.32, *p* = 0.132 | *F*1,91 = 4.12, *p* = 0.045 |
| Experi. | 0.34 (0.30) | 0.47 (0.48) | 0,53 (0.57) |
| SCL-90-R – Depression | Control | 0.80 (0.61) | 1.05 (0.68) | 1.23 (0.67) | *F*2,182 = 9.71,  *p* < 0.001, *η2partial* = 0.096 | *F*2,182 = 1.42,  *p* = 0.244, *η2partial* = 0.015 | *F*1,91 = 6.67,  *p* = 0.011, *η2partial* = 0.068 | *F*6,59921 = 7.87, *p* < 0.001 | *F*1,91 = 1.64, *p* = 0.204 | *F*1,91 = 1,72, *p* = 0.193 | *F*1,91 = 2.08, *p* = 0.153 |
| Experi. | 0.58 (0.48) | 0.88 (0.77) | 0.81 (0.80) |
| SCL-90-R – Anxiety | Control | 0.51 (0.54) | 0.62 (0.60) | 0.71 (0.66) | *F*2,182 = 4.65,  *p* = 0.011, *η2partial* = 0.049 | *F*2,182 = 0.51,  *p* = 0.603, *η2partial* = 0.006 | *F*1,91 = 6.05,  *p* = 0.016, *η2partial* = 0.062 | *F*6,59921 =10.05, *p* < 0.001 | *F*1,91 = 8.81, *p* = 0.004 | *F*1,91 = 0.00, *p* = 0.968 | *F*1,91 = 0.85, *p* = 0.360 |
| Experi. | 0.28 (0.27) | 0.46 (0.59) | 0.43 (0.58) |
| SCL-90-R – Hostility | Control | 0.54 (0.72) | 0.53 (0.67) | 0.66 (0.75) | *F*2,182 = 2.83,  *p* = 0.062, *η2partial* = 0.030 | *F*2,182 = 2.51,  *p* = 0.084, *η2partial* = 0.027 | *F*1,91 = 3.94,  *p* = 0.050, *η2partial* = 0.042 | *F*6,59921 = 10.21, *p* < 0.001 | *F*1,91 = 15.72, *p* < 0.001 | *F*1,91 = 0.25, *p* = 0.619 | *F*1,91 =2.74, *p* = 0.101 |
| Experi. | 0.23 (0.28) | 0.48 (0.62) | 0.39 (0.54) |
| SCL-90-R –Phobic Anxiety | Control | 0.50 (0.62) | 0.73 (0.70) | 0.89 (0.88) | *F*2,182 = 6.68,  *p* = 0.002, *η2partial* = 0.068 | *F*2,182 = 0.40,  *p* = 0.215, *η2partial* = 0.017 | *F*1,91 = 9.45,  *p* = 0.003, *η2partial* = 0.094 | *F*6,59921 = 10.20, *p* < 0.001 | *F*1,91 = 6.27, *p* = 0.014 | *F*1,91 = 4.17, *p* = 0.044 | *F*1,91 = 4.49, *p* = 0.027 |
| Experi. | 0.31 (0.43) | 0.47 (0.49) | 0.45 (0.57) |
| SCL-90-R – Paranoid Ideation | Control | 0.52 (0.67) | 0.43 (0.50) | 0.62 (0.72) | *F*2,182 = 2.35,  *p* = 0.098, *η2partial* = 0.025 | *F*2,182 = 0.98,  *p* = 0.377, *η2partial* = 0.011 | *F*1,91 = 5.12,  *p* = 0.026, *η2partial* = 0.053 | *F*6,59921 = 7.91, *p* < 0.001 | *F*1,91 = 20.17, *p* < 0.001 | *F*1,91 = 0.90, *p* = 0.346 | *F*1,91 = 5.35, *p* = 0.023 |
| Experi. | 0.27 (0.30) | 0.34 (0.40) | 0.39 (0.47) |
| SCL-90-R – Psicoticism | Control | 0.45 (0.55) | 0.44 (0.47) | 0.66 (0.67) | *F*2,182 = 0.82,  *p* = 0.005, *η2partial* = 0.056 | *F*2,182 = 1.04,  *p* = 0.356, *η2partial* = 0.011 | *F*1,91 = 4.87,  *p* = 0.001, *η2partial* = 0.123 | *F*6,59921 = 12.46, *p* < 0.001 | *F*1,91 = 35.49, *p* < 0.001 | *F*1,91 = 4.41, *p* = 0.039 | *F*1,91 = 3.31, *p* = 0.072 |
| Experi. | 0.18 (0.21) | 0.26 (0.38) | 0.32 (0.46) |
| SCL-90-R – GSI (General Symptom Index) | Control | 0.64 (0.52) | 0.77 (0.50) | 0.94 (0.61) | *F*2,182 = 6.56,  *p* = 0.002, *η2partial* = 0.067 | *F*2,182 = 1.38,  *p* = 0.254, *η2partial* = 0.015 | *F*1,91 = 4.53,  *p* = 0.001, *η2partial* = 0.113 | *F*6,59921 = 88.24, *p* < 0.001 | *F*1,91 = 6.83, *p* = 0.010 | *F*1,91 = 0.02, *p* = 0.901 | *F*1,91 = 40.32, *p* = 0.570 |
| Experi. | 0.43 (0.28) | 0.59 (0.49) | 0.56 (0.53) |

**Table 5**

*Statistically significant differences (α = 0.05) for post hoc comparisons (Bonferroni correction) between the two groups [experimental (E) and control (C)] for the three measures (pre-treatment, intermediate, and post-treatment) in the different dependent measures.*

| **Measure** | **Pretest** | **Intermedia** | **Posttest** |
| --- | --- | --- | --- |
| **SF-36 – General Health** |  |  | E > C |
| **SF-36 – Physical Function** |  |  | E > C |
| **SF-36 – Physical Role** |  | E > C | E > C |
| **SF-36 – Emotional Role** |  | E > C |  |
| **SF-36 – Social Function** |  |  |  |
| **SF-36 – No Body Pain** |  |  | E > C |
| **SF-36 – Vitality** |  | E > C | E > C |
| **SF-36 – Mental Health** |  |  | E > C |
| **SF-36 – Health Transition** |  |  |  |
| **SF-36 – Total** |  |  | E > C |
| **SCL-90-R - Somatization** |  |  | E < C |
| **SCL-90-R – Obsessive Compulsive** | E < C | E < C | E < C |
| **SCL-90-R – Interpersonal Susceptibility** |  |  |  |
| **SCL-90-R – Depression** |  |  | E < C |
| **SCL-90-R – Anxiety** | E < C |  | E < C |
| **SCL-90-R – Hostility** | E < C |  | E < C |
| **SCL-90-R – Phobic Anxiety** |  | E < C | E < C |
| **SCL-90-R – Paranoid Ideation** | E < C |  |  |
| **SCL-90-R – Psychoticism** | E < C | E < C | E < C |
| **SCL-90-R – GSI** | E < C |  | E < C |
